# Supplementary material for: Phytosterol structured algae oil nanoemulsions and powders: improving antioxidant and flavor properties
Source: Royal Society of Chemistry journal article supplement (doi:10.1039/c6fo00449k), 2016-01-01
Supplement: c6fo00449k1.pdf [file c6fo00449k1.pdf]

**Supporting Information Available:**

**Fig. 1S.** Confocal laser scanning microscopy (CLSM) images of the Sito organogel-based coarse emulsions prepared at room temperature (A) and heating contention (85 °C) (B). The arrow indicates the surface coated by the  $\beta$ -sitosterol crystals.

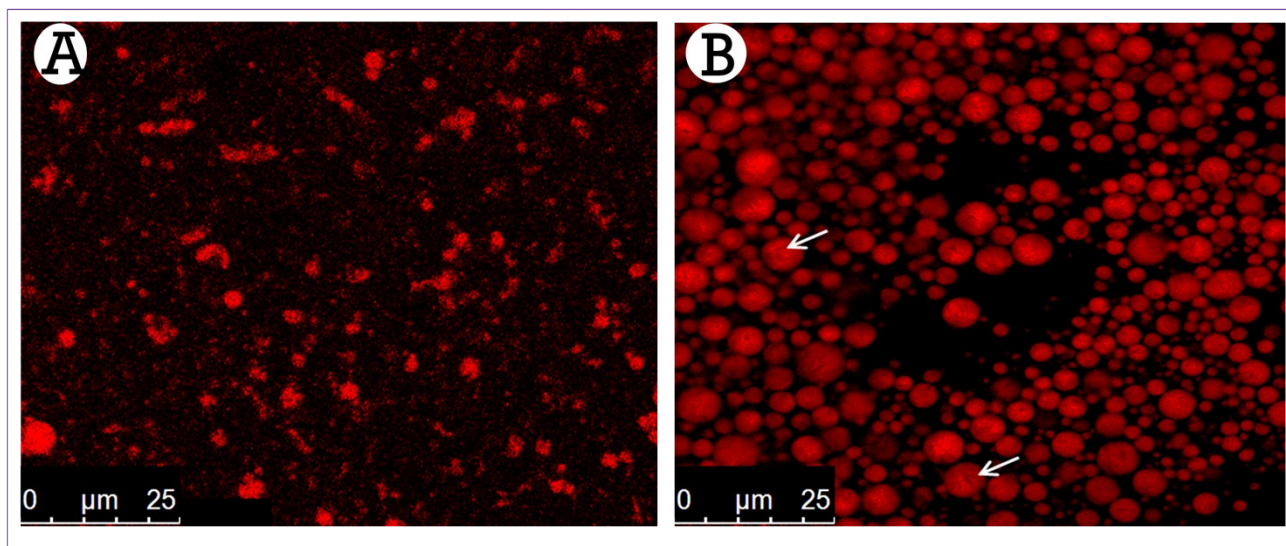

Chen et al (Color online only)
